# Supplementary material for: Microglia subtypes in acute, subacute, and chronic multiple sclerosis
Source: PubMed Central journal article supplement — J Neuropathol Exp Neurol. 2023 Jun 21;82(8):674–94. doi: 10.1093/jnen/nlad046 (PMC10357941; doi:10.1093/jnen/nlad046), 2023-06-21
Supplement: nlad046_supplementary_data.pdf [file nlad046_supplementary_data.pdf]

**Fig S1**

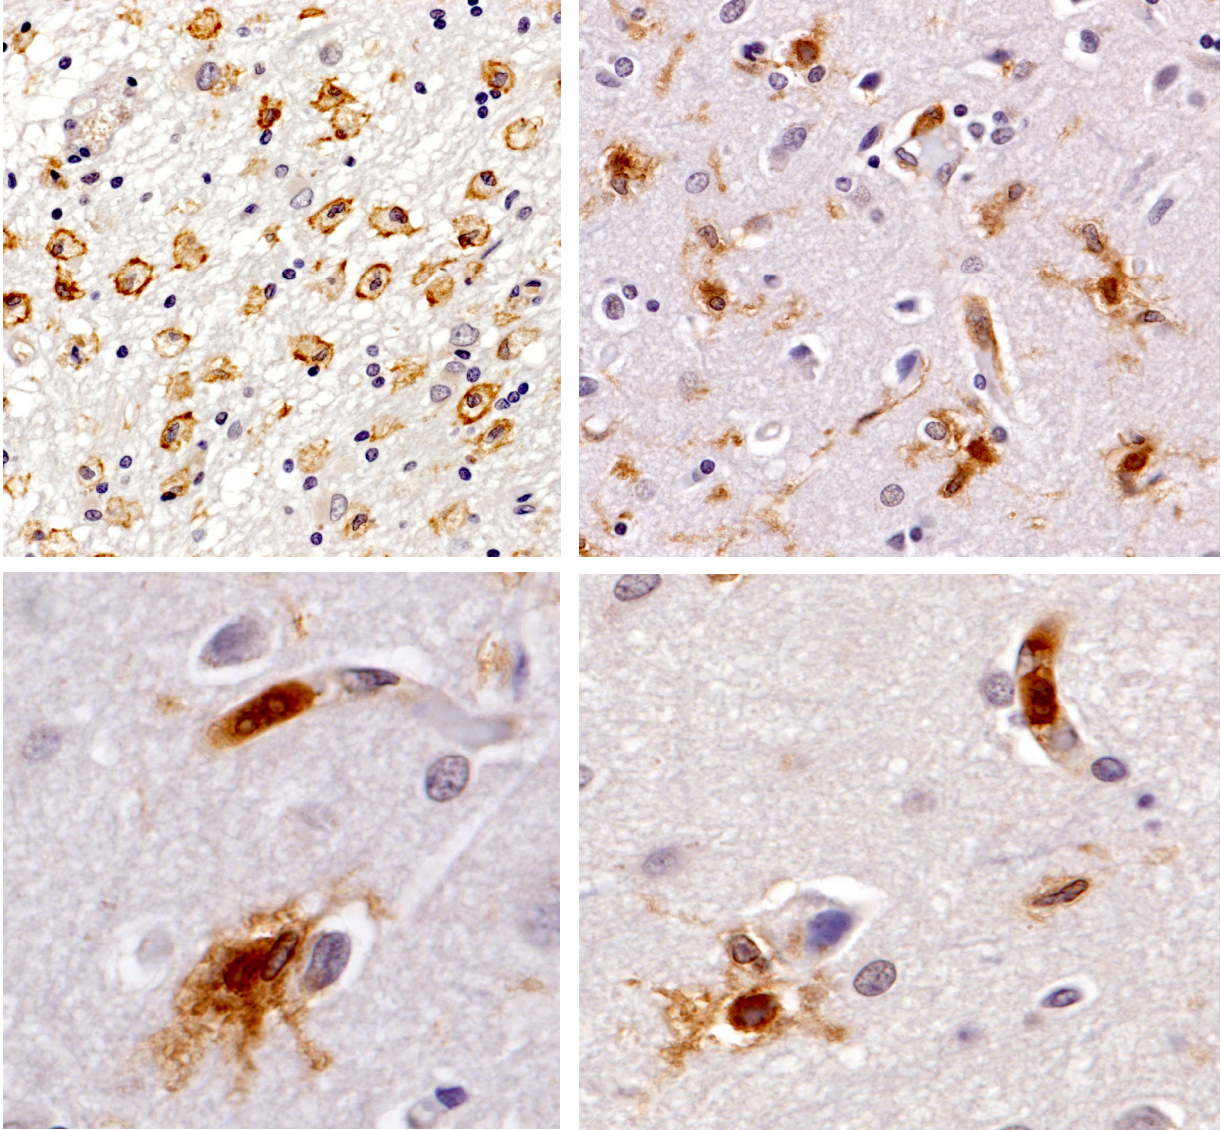

**Fig S1** CD16+ monocytes and microglia: foamy macrophages (top left); nodules of ensheathed monocytes (top right); intravascular monocytes ('plugs') and reticulate microglia (bottom). (Case 16, CD16)

**Fig S2**

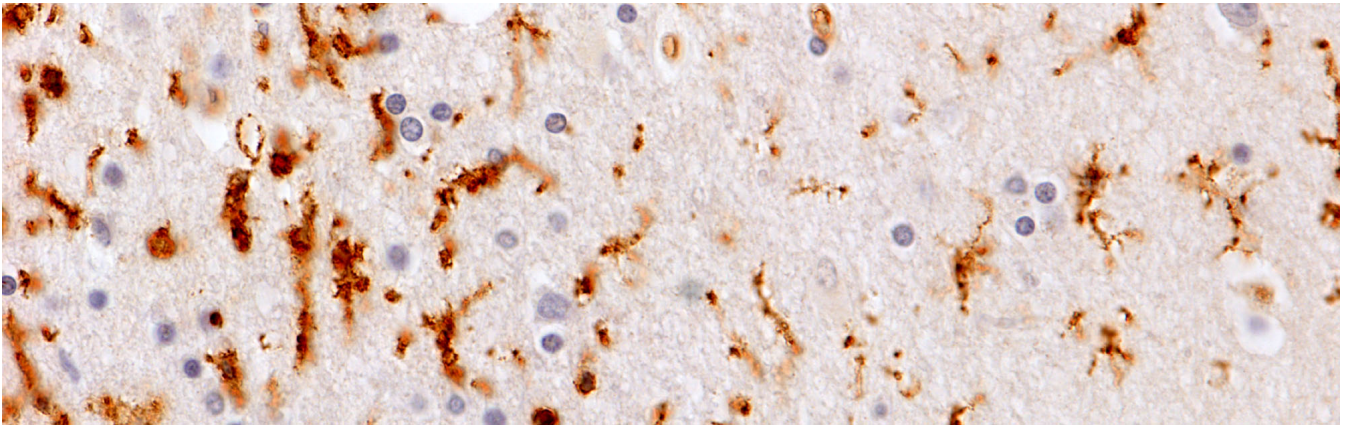

**Fig S2** Non-ramified activated microglia (left of figure) as seen at one edge of plaque 4, Case 2. Ramified microglia (right of figure) are normal in appearance. (Case 2, plaque 4, CD45)

**Fig S3**

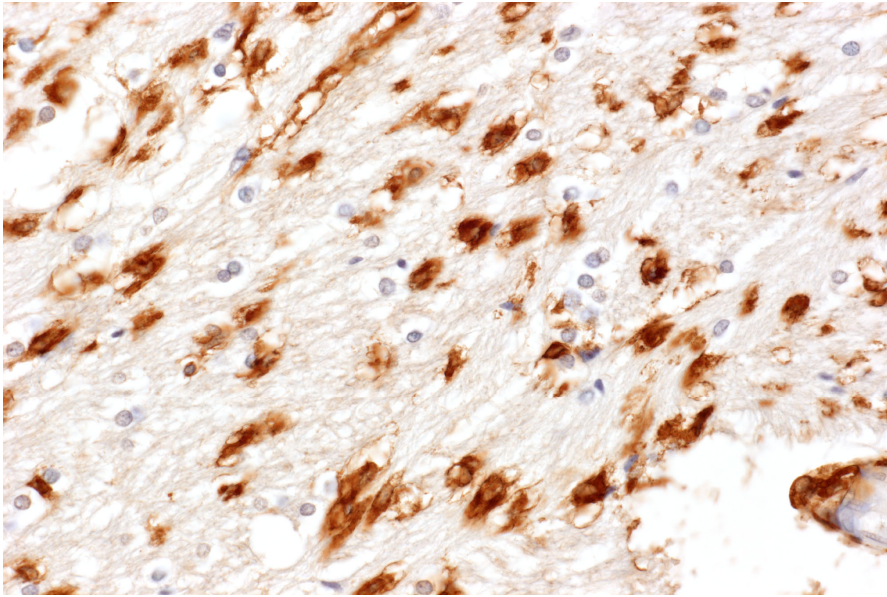

Activated MHCII+ microglia bordering intact white matter, Case 4.

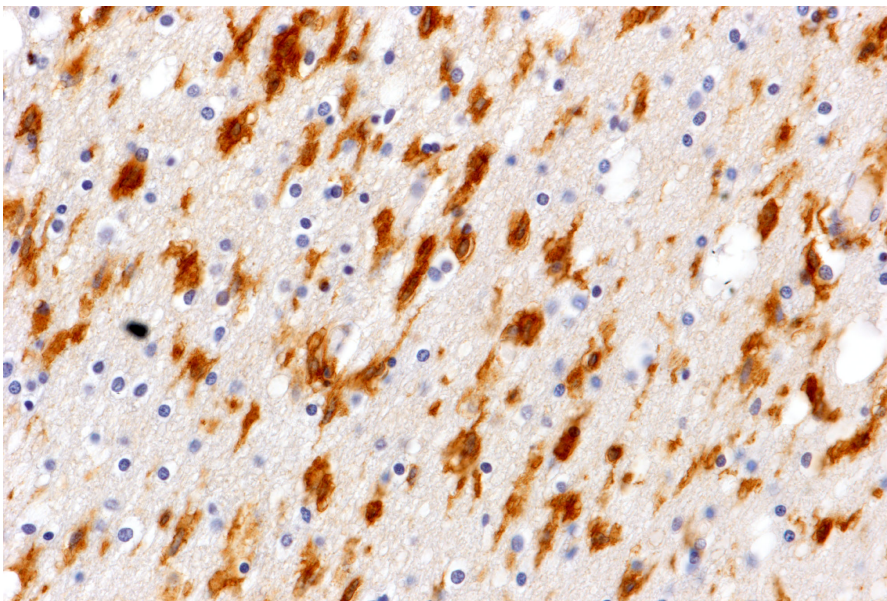

Activated MHCII+ microglia bordering intact white matter, Case 16.

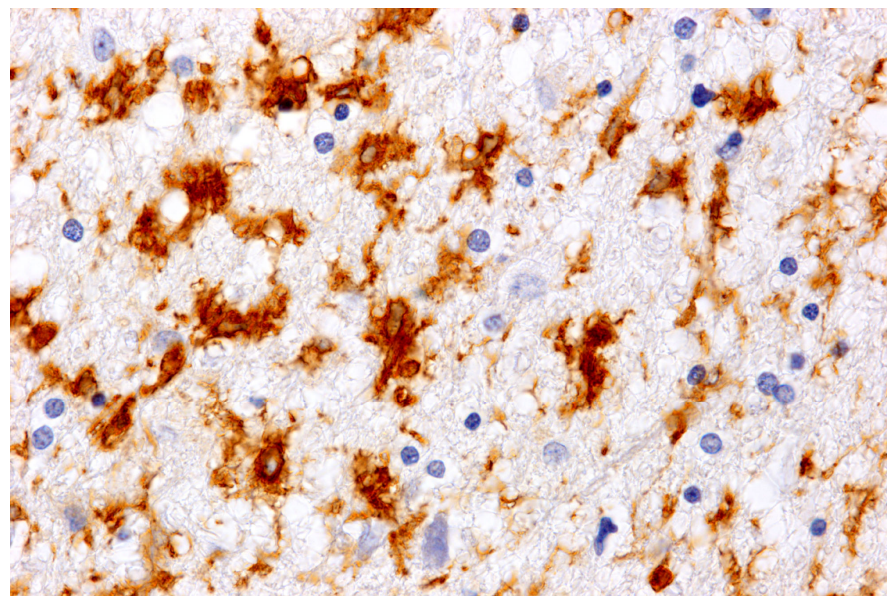

Activated MHCII+ microglia bordering intact white matter, Case 17.

**Fig S4**

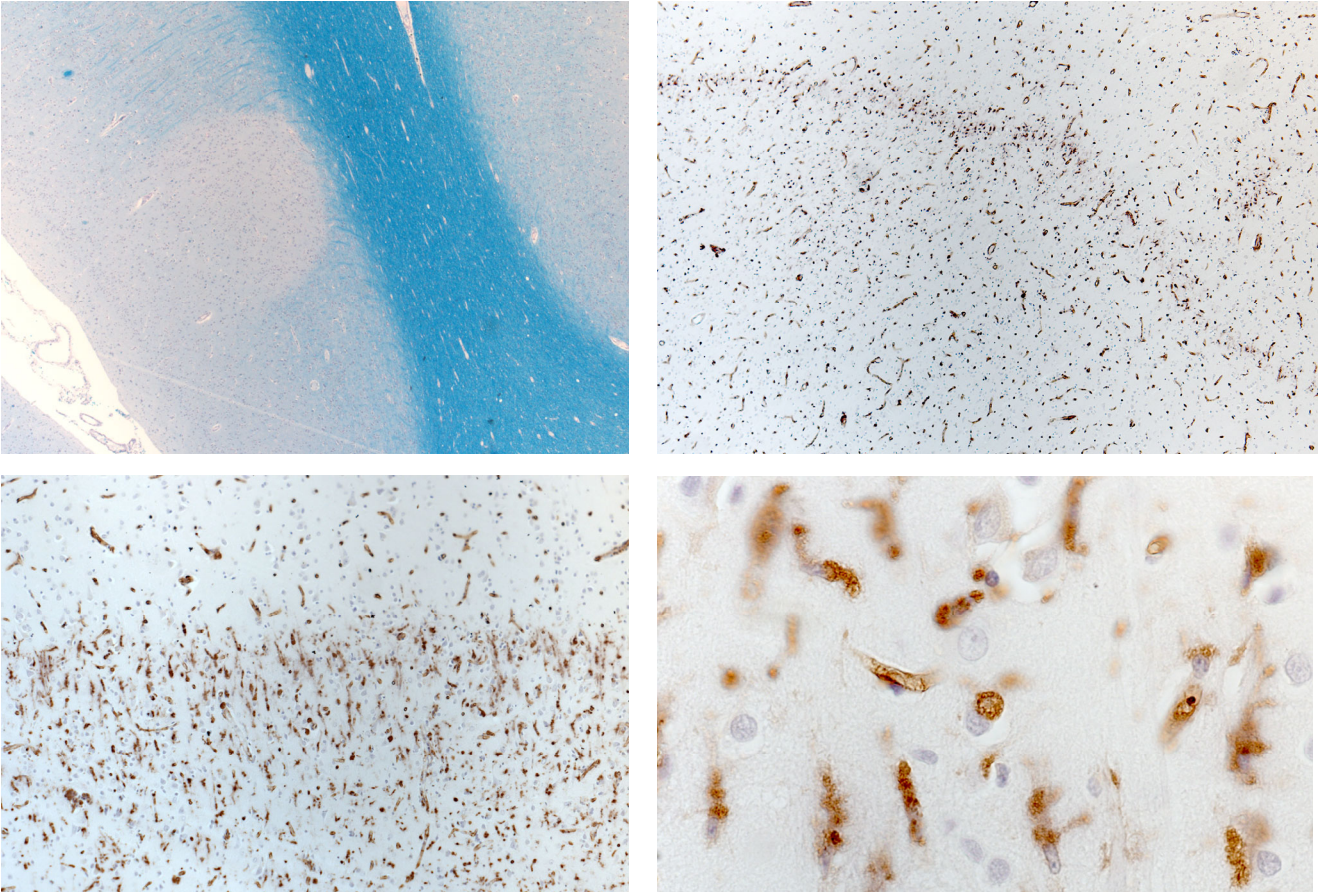

**Fig S4** A narrow wall of RCA1+ microglia and capillaries outlines a typical small plaque located in the cerebral cortex. (Case 23, RCA1)

**Fig S5**

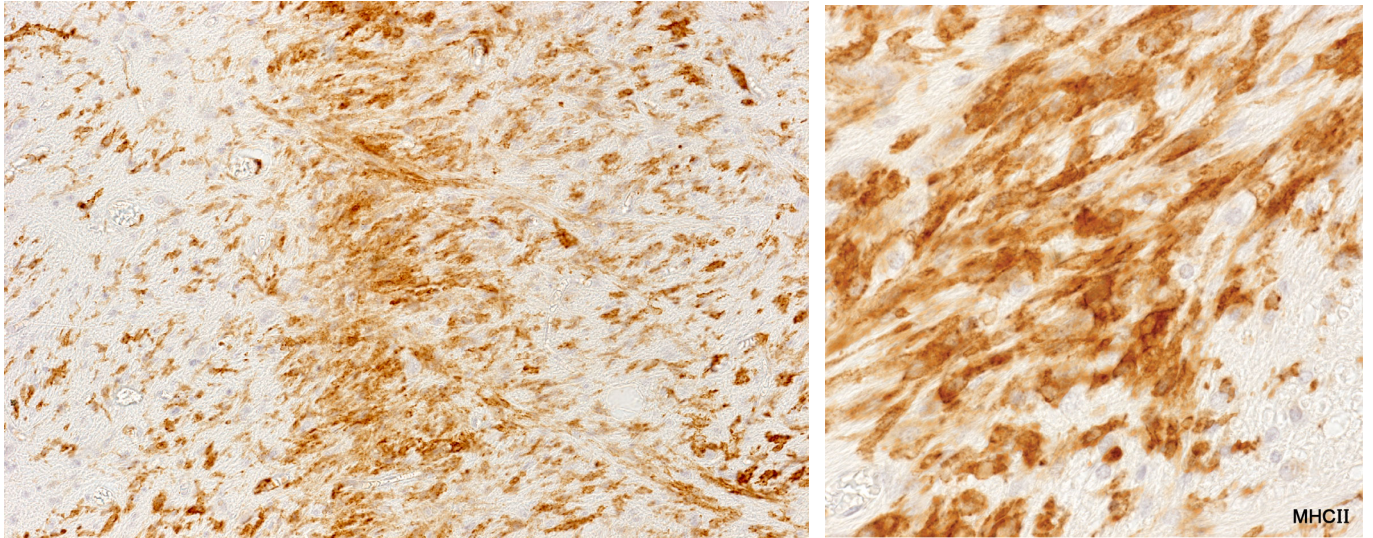

**S5A** MHCII+ wall microglia. (Case 24, plaque 3, MHCII)

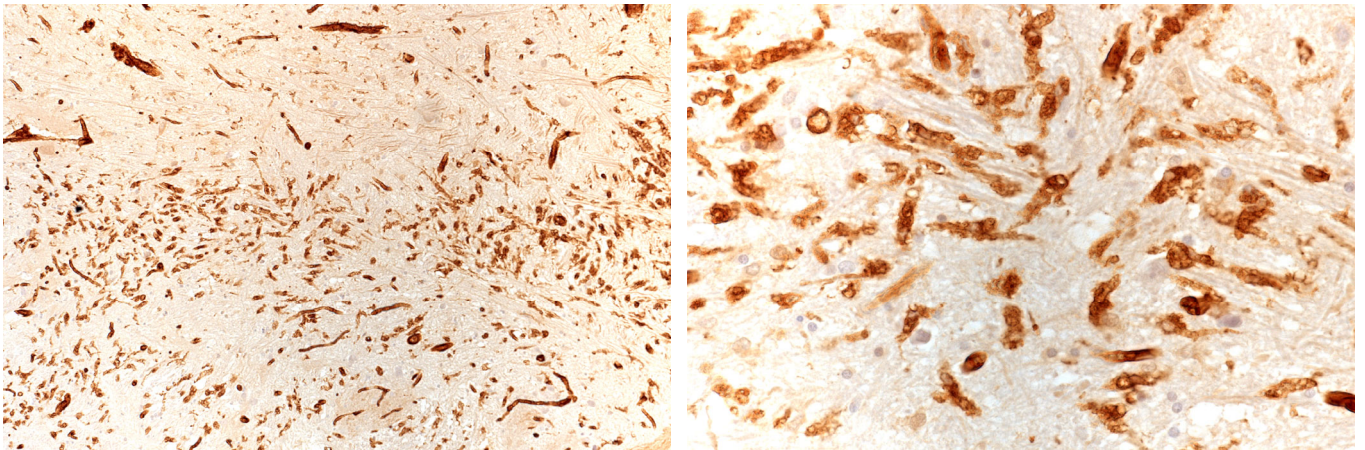

**S5B** A wall of RCA1+ wall microglia and RCA1+ capillaries at the edge of a small brainstem plaque known to be immunoreactive for activated complement (C9neo). (Case 2, plaque 3, RCA1)

**Fig S6**

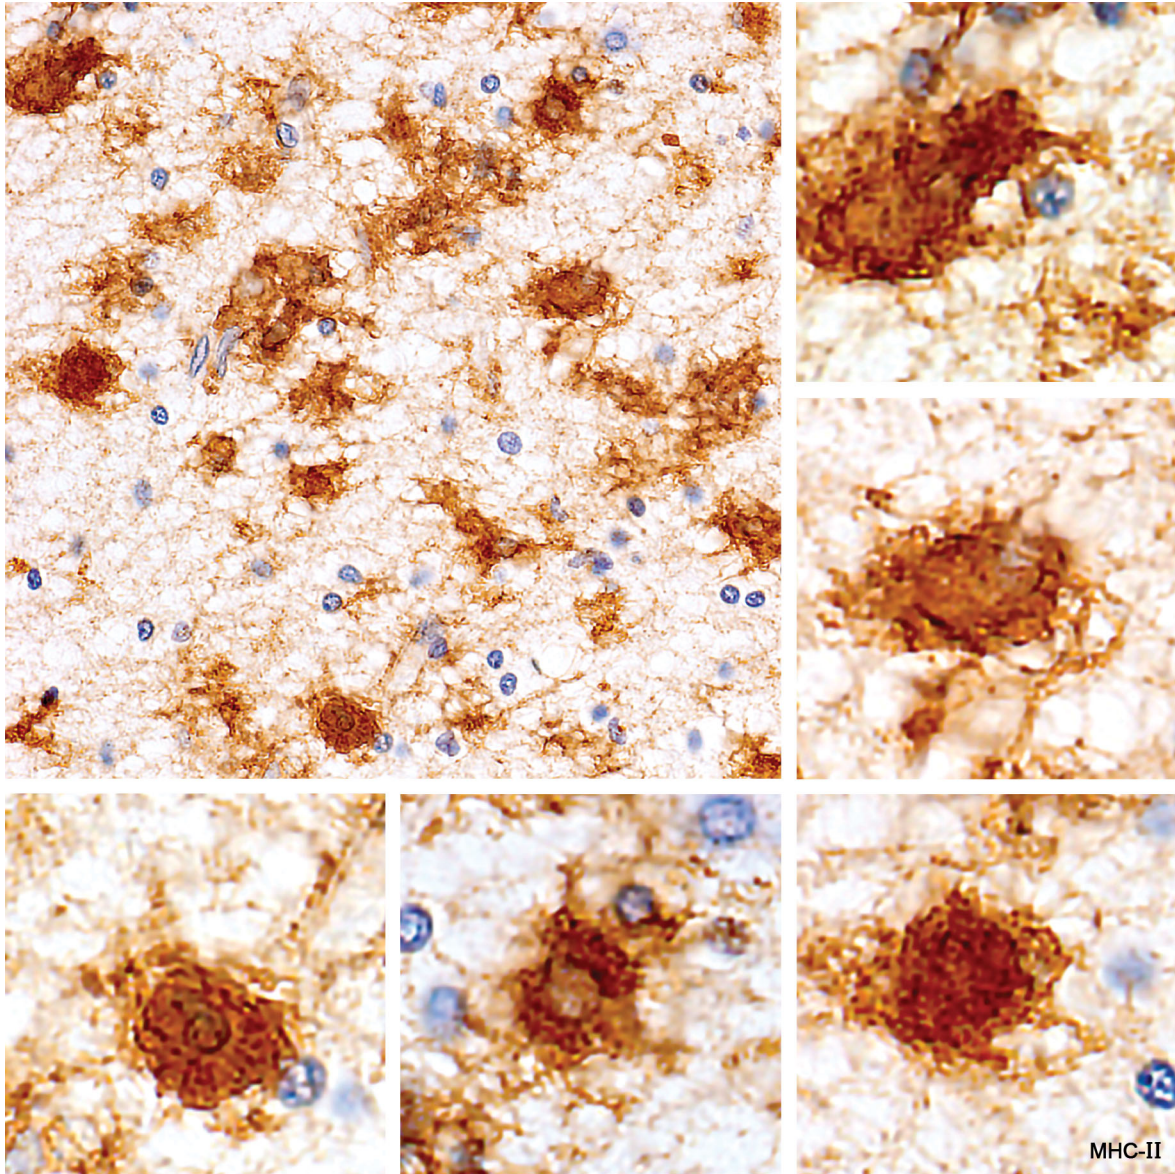

**Fig S6** Nodules composed of compacted MHCII+ cells in intact white matter bordering an otherwise typical chronic plaque. (Case 16, MHCII)

**Fig S7**

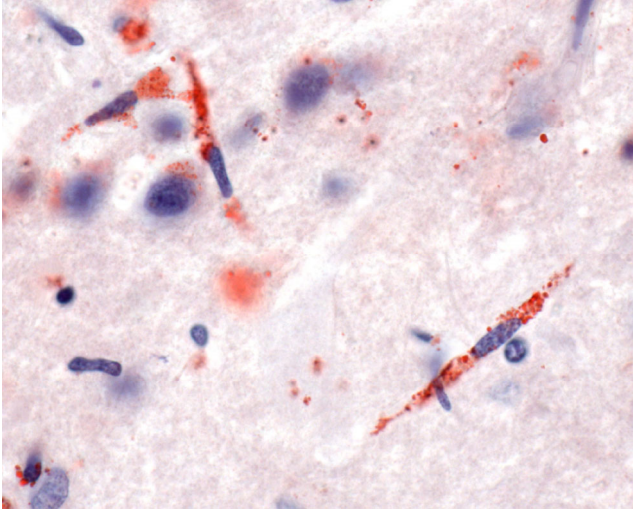

**Fig S7** Spindle shaped phagocytes in a developing plaque in the cerebral cortex. (Oil Red O)

Fig S8

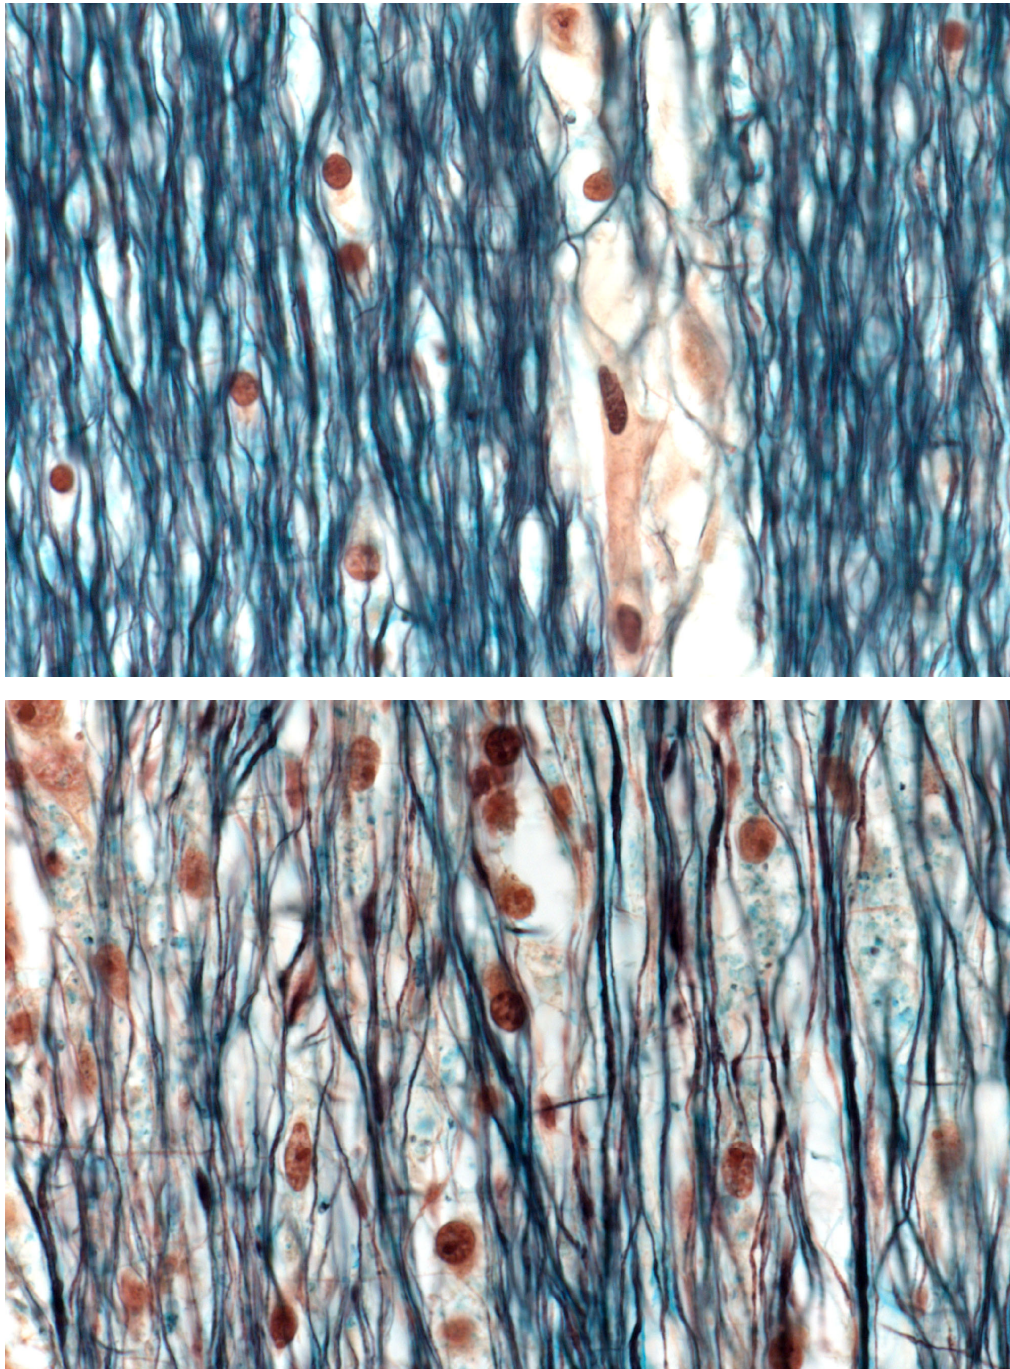

**Fig S8** Round cells and phagocytes. **Top:** In a section stained for both myelin and axons, myelinated tissue bordering a developing plaque appears normally compact and with several (two) normal looking oligodendrocytes present. **Bottom:** The edge of the same plaque is less compact (more fluid-filled spaces), axons are intact, there is commencing loss of myelin, oligodendrocytes are hard to identify, and there are a number of large round cells, probably early phagocytes. (Case 5, xxx)



Fig S9

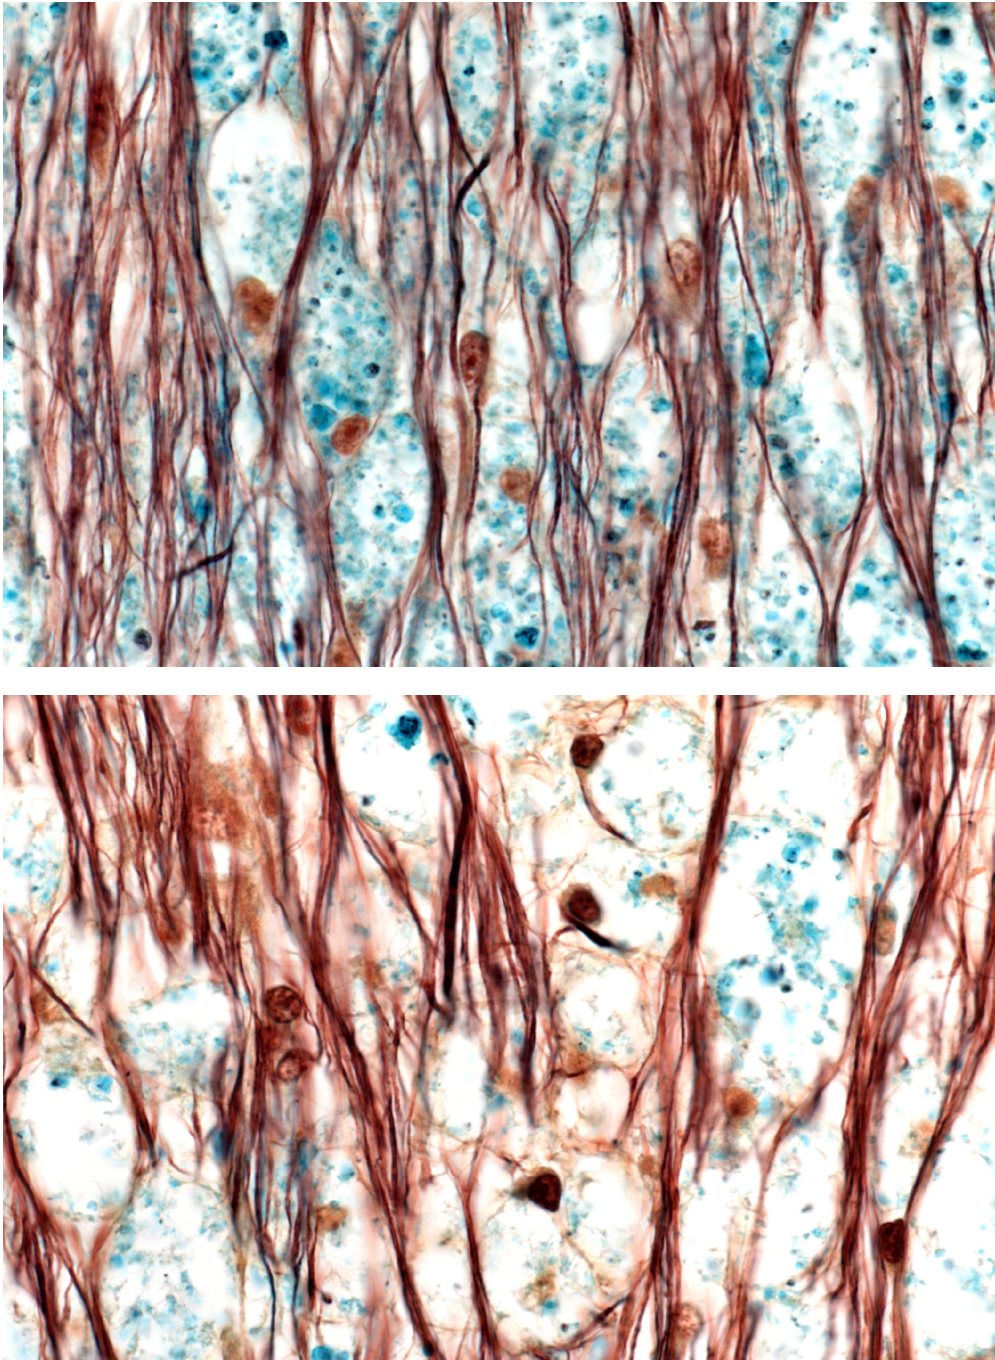

**Fig S9** Round cells and phagocytes at the edge of the newly forming plaque shown in Fig S8. **Top:** Myelin loss is complete, phagocytes distended with particles of undigested myelin fill the extracellular space, and axons are preserved. There are no oligodendrocytes visible in this field. **Bottom:** Deeper in the lesion a field of foamy macrophages. (Case 5, **xxxx**)

**Fig S10**

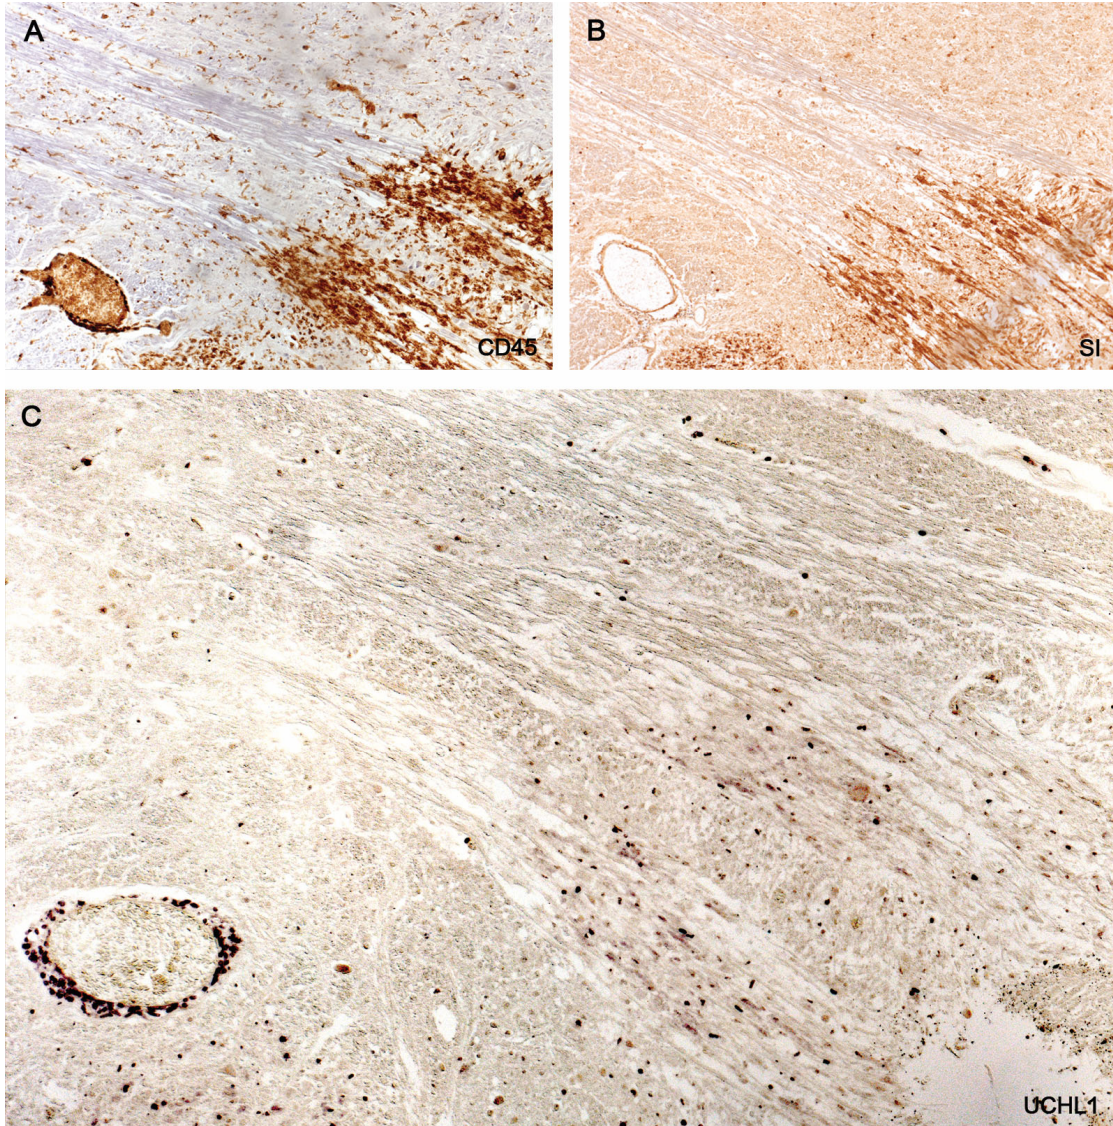

**Fig S10** The expanding edge of a still- myelinated newly forming lesion (a plaque packed with wall microglia). **A:** CD45+ myelin phagocytes. **B:** myelin stains positively with biotinylated multiple sclerosis CSF IgG. **C:** UCHL1+ lymphocytes. (Case 2, plaque 1)

**Fig S11**

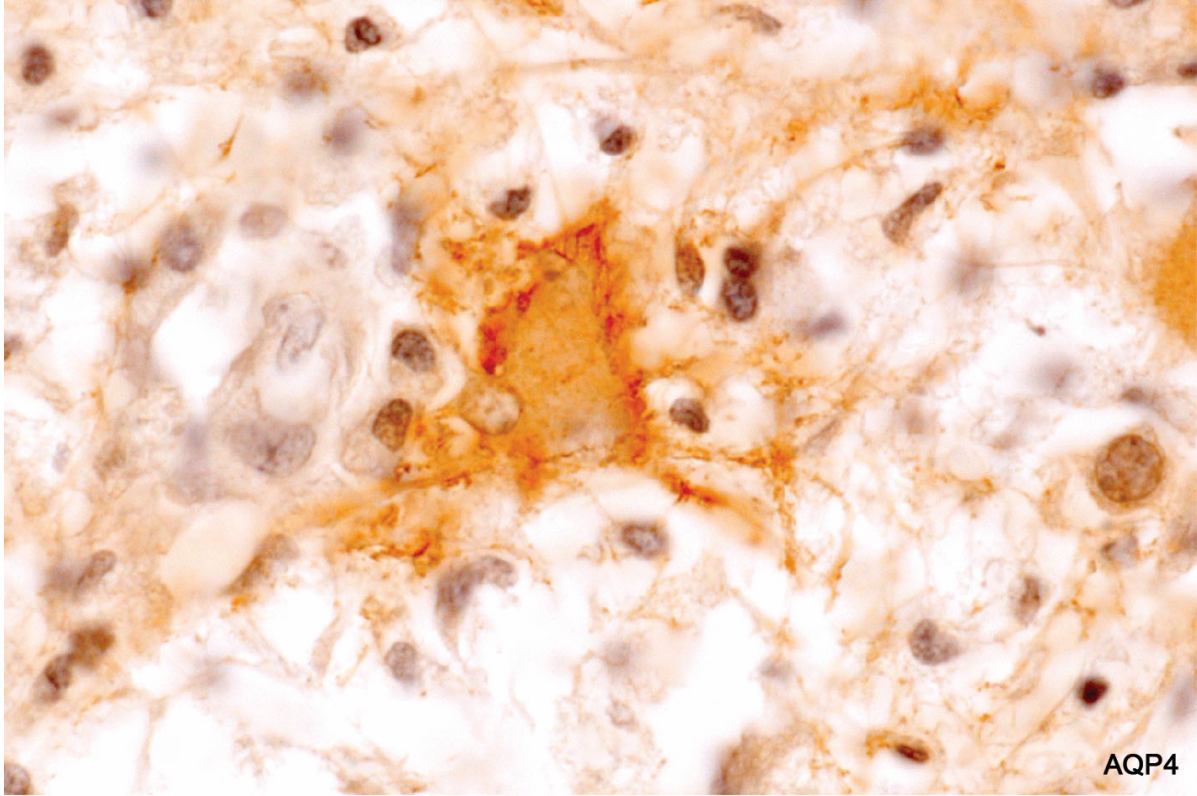

**Fig S11** Destruction of an AQP4+ astrocyte by macrophages. (Case 14, AQP4)

**Fig S12**

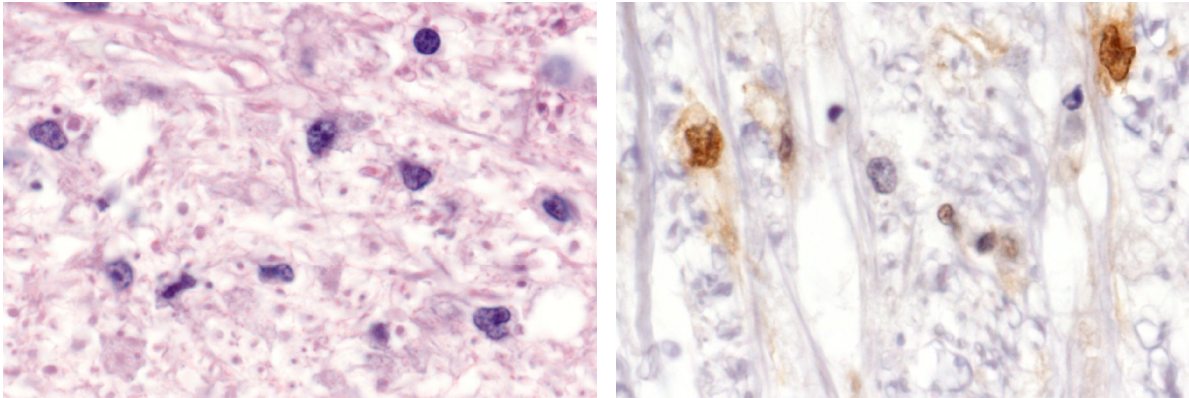

**Fig S12** Infiltration and proliferation of early macrophages in normally myelinated white matter bordering a developing brain stem plaque. There are no normal oligodendrocytes present. Apoptotic oligodendrocytes in normally myelinated tissue were identified in other sections of the same lesion. (Case 9, Hematoxylin and E (left), proliferation cell marker PCNA (right))

**Fig S13A**

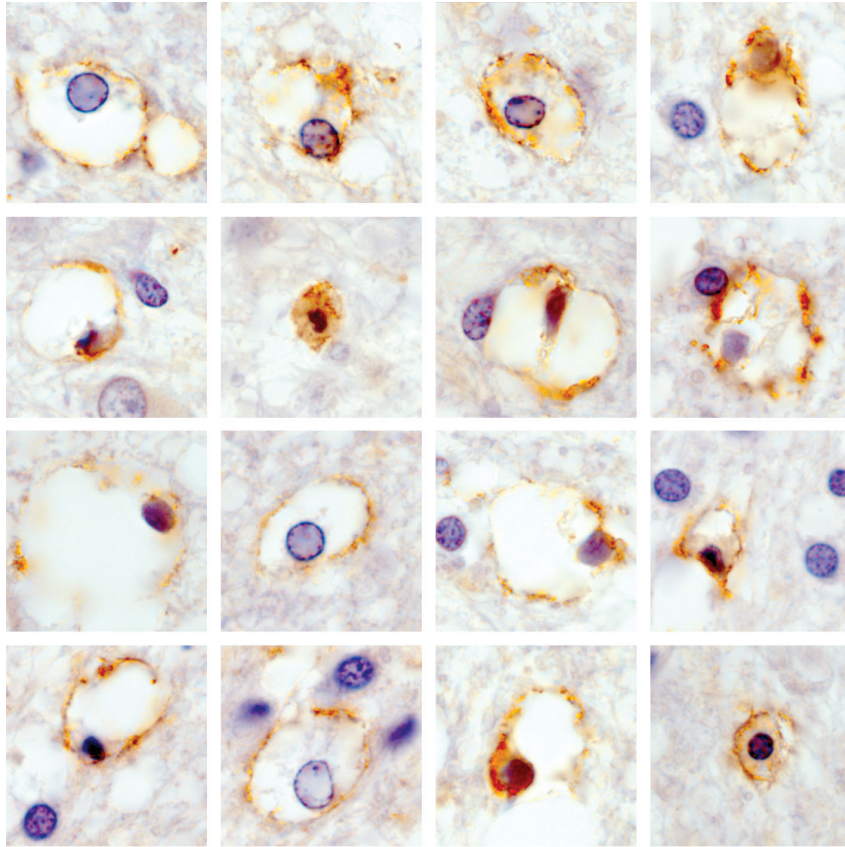

**Fig S13A** Degenerate oligodendrocytes immunoreactive for activated complement located in a partially remyelinated shadow plaque. (Plaque 4 Case 2, C9neo).

**Fig S13B**

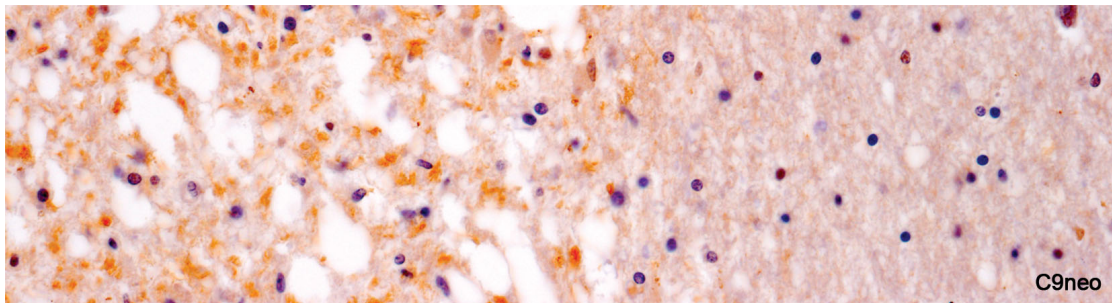

**Fig S13B** Perimeter of plaque 4, case 2, showing oligodendrocyte loss and complement-reactive vacuolated myelin. Parenchymal monocytes and MRP14+ phagocytes were largely absent in this partially remyelinated shadow plaque. (Case 2, C9neo)

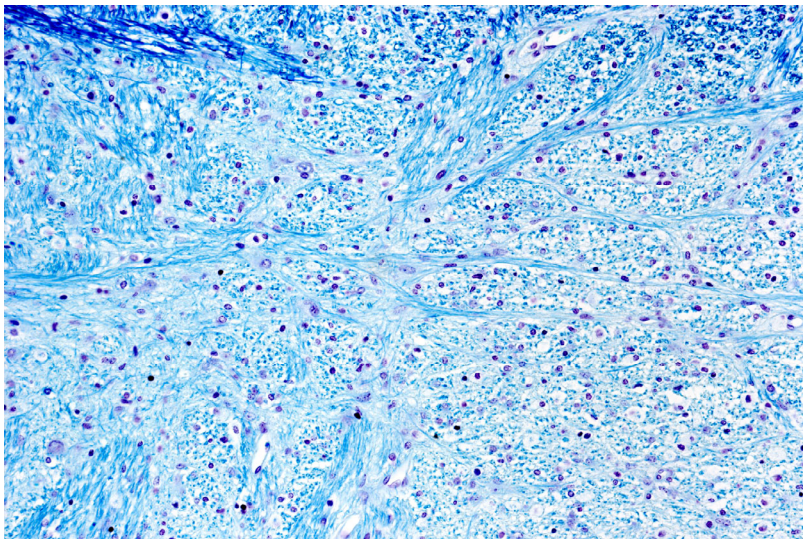

**Fig S13C** A remyelinated shadow plaque in a patient with early MS. A band of normally myelinated tissue can be seen at the top of the figure. (Non-index MS case, Luxol Fast Blue)

**Fig S14**

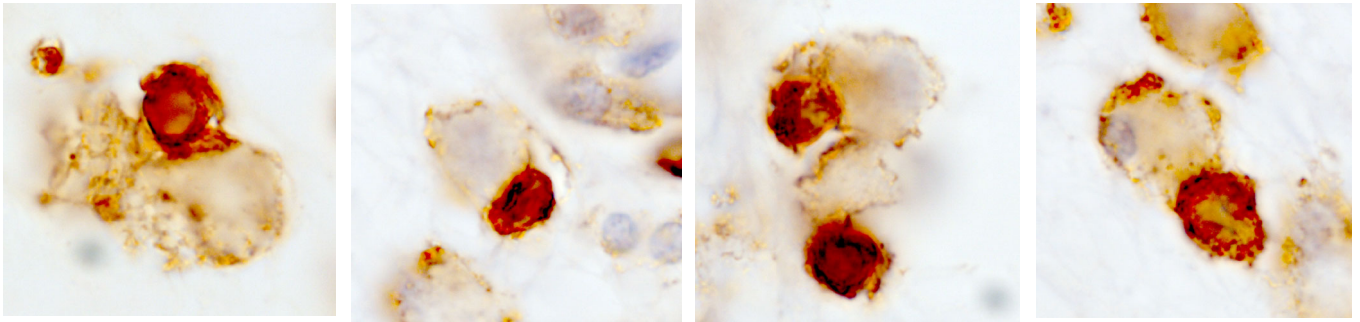

**Fig S14A** Monocyte /foamy macrophage contact. (Case 16, CD45)

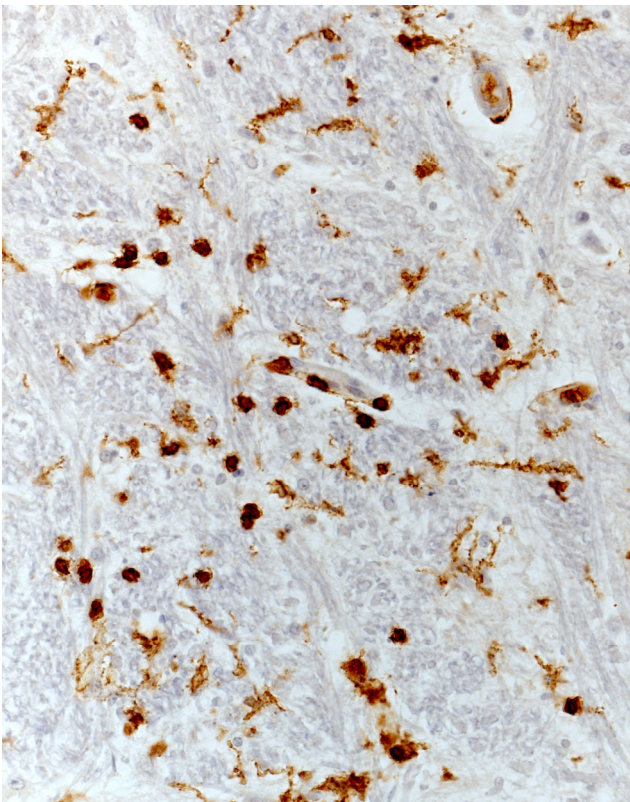

**Fig S14C** Perivascular monocytes, normal white matter. (Case 2, CD45)

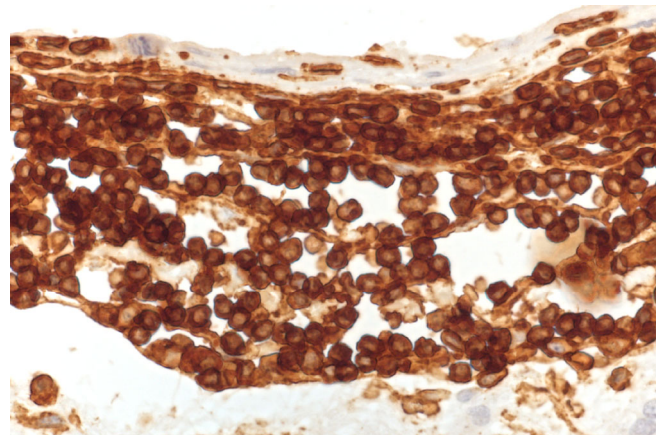

**Fig S14B** Perivascular space monocytes located in demyelinated tissue. (Case 3, CD45)

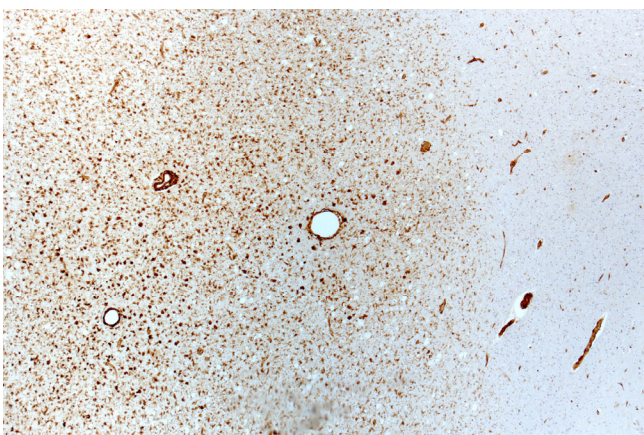

**Fig S14D** Parenchymal monocytes located around a blood vessel situated in a field of RCA1+ microglia. (Case 2 plaque 4, RCA1)

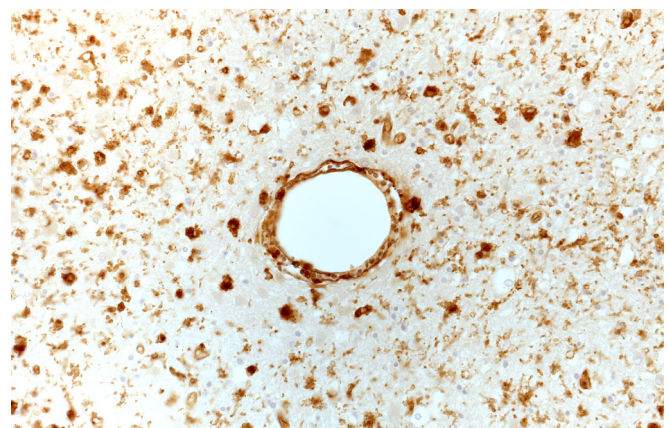

**Fig S15**

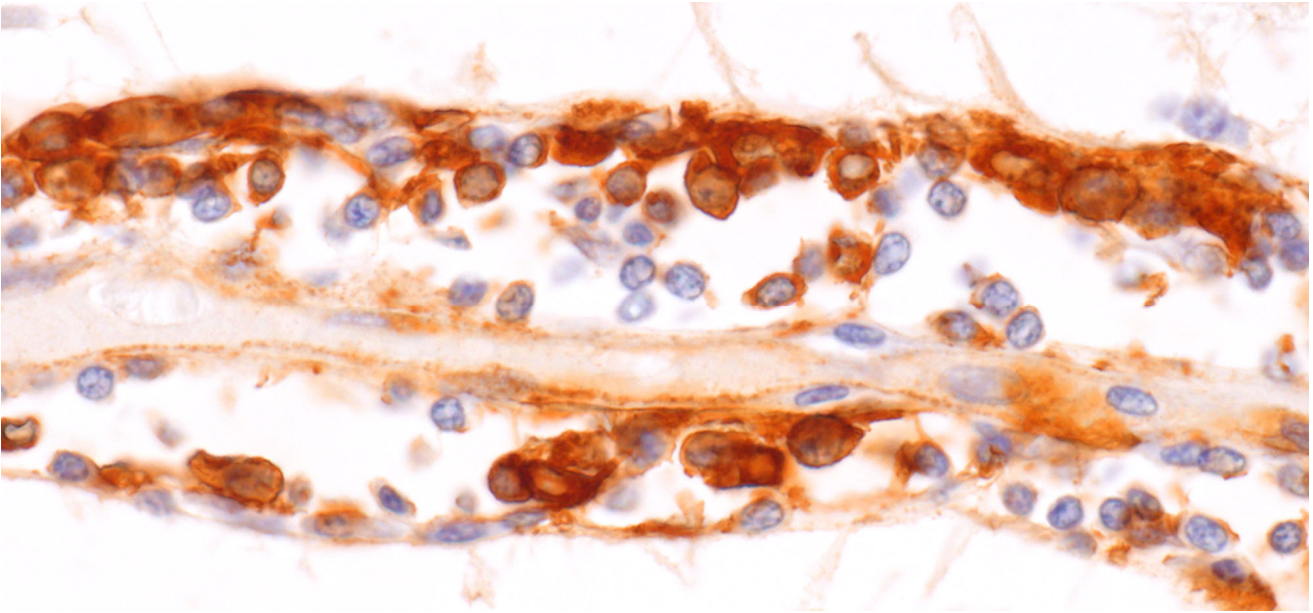

**Fig S15A** A perivascular cuff of MHCII-negative lymphocytes, MHCII-positive lymphocytes and MHCII-positive larger cells. The vessel was located in demyelinated tissue in a newly forming basal ganglia plaque. (Case 4, MHCII)

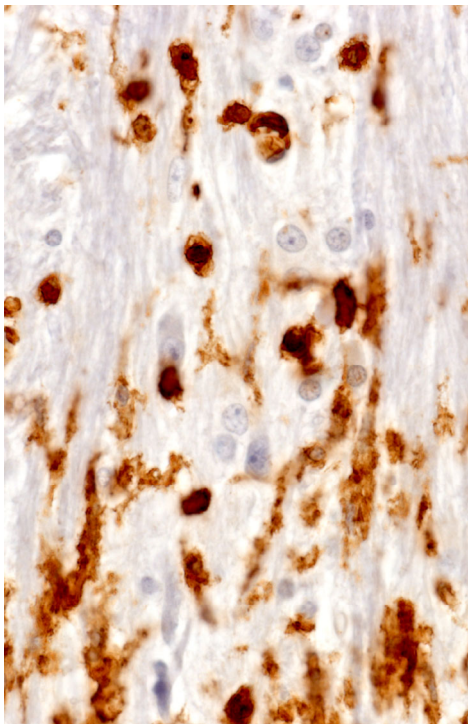

**S15C** Infiltrating monocytes and early phagocytes at the edge of an expanding exceptionally early newly forming plaque. (Case 2, plaque 1, CD45)

**Fig S15B**

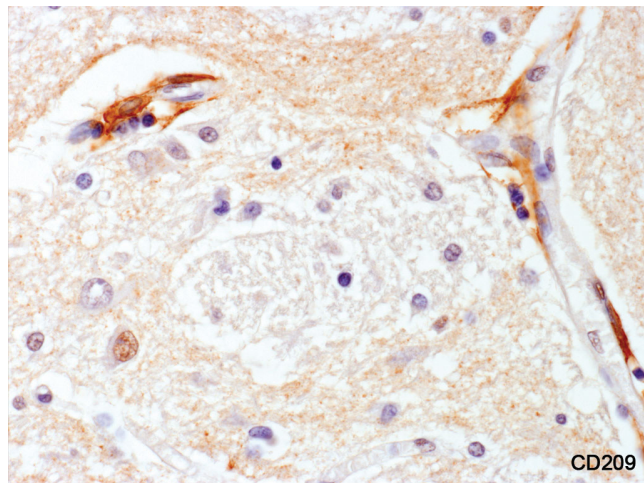

**Fig S15B** CD209+ dendritic cells in walls of small blood vessels in myelinated tissue bordering an expanding plaque. (Case 4, CD209)

**Fig S16**

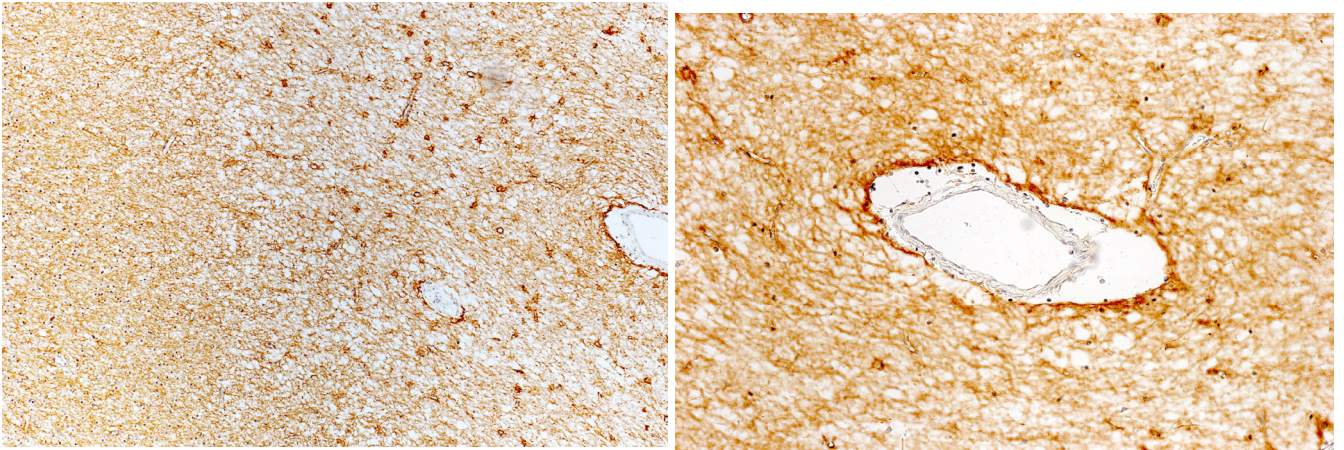

**Fig S16A** Chronic multiple sclerosis. Regenerated AQP4– positive astrocyte foot processes. (Case 16, AQP4)

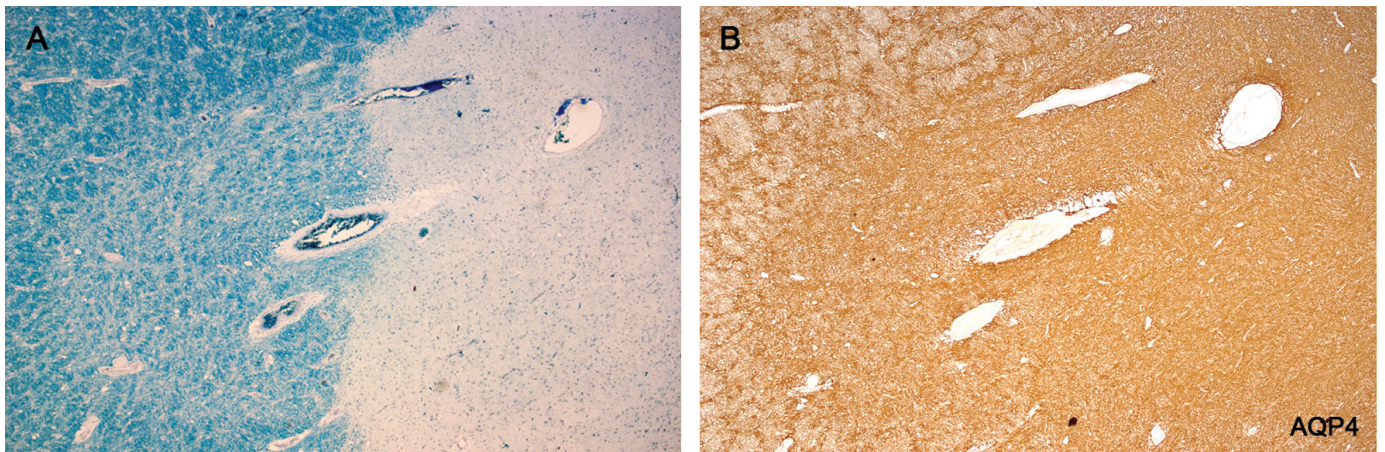

**Fig S16B AB** Chronic multiple sclerosis. Regenerated AQP4-positive astrocytes in a partially demyelinated shadow plaque. (Case 22, AQP4)

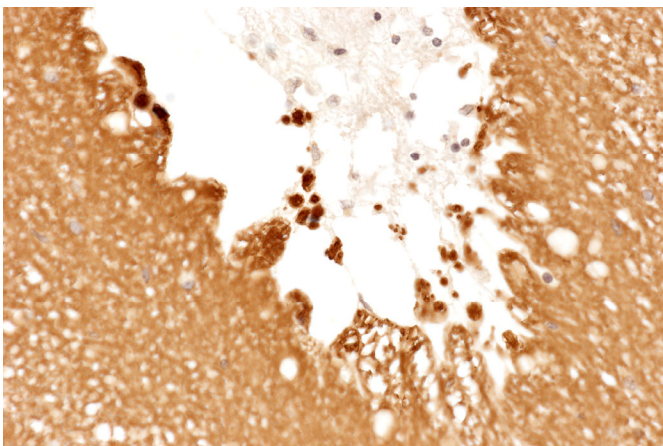

**Fig S16C** Chronic multiple sclerosis. Abnormally regenerated AQP4-positive perivascular glial limiting membrane astrocyte foot processes. (Case 22, AQP4)



**Fig S17**

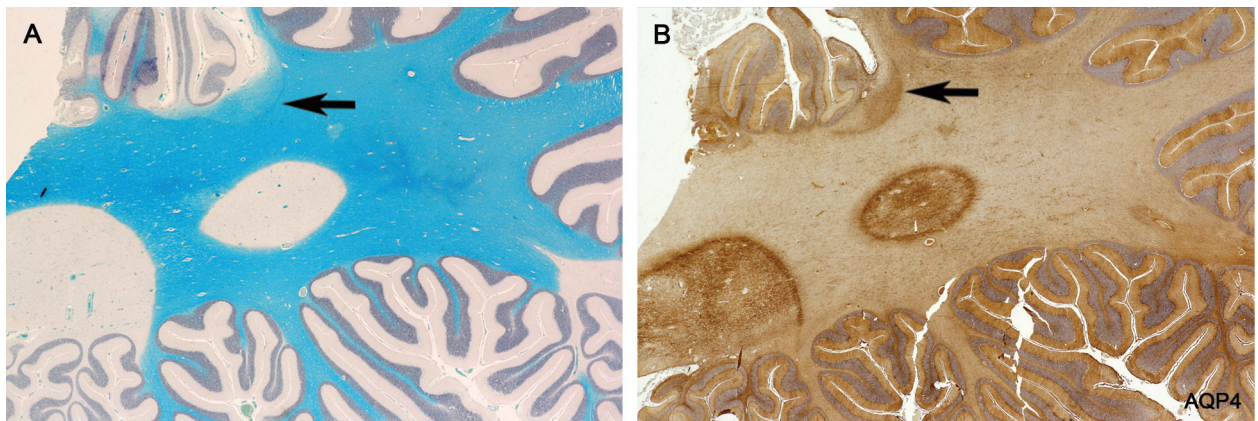

**Fig S17** A magnified view of four plaques of different histological age in a patient with longstanding MS. **Top:** An old remyelinated shadow plaque (arrows). **Left:** A gliosed plaque filled with AQP4+ astrocytes and foamy macrophages. No LFB+ macrophages. **Center:** A gliosed plaque with numerous AQP4+ astrocytes, scant foamy macrophages, no LFB+ macrophages. **Right:** An old plaque, no foamy macrophages, fewer AQP4+ astrocytes. Edge walls of wall microglia, astrocytes and monocytes outlined two of the plaques, the one on the left and the one in the middle. (Case 18, left - Luxol Fast Blue, right - AQP4)

**Fig S18**

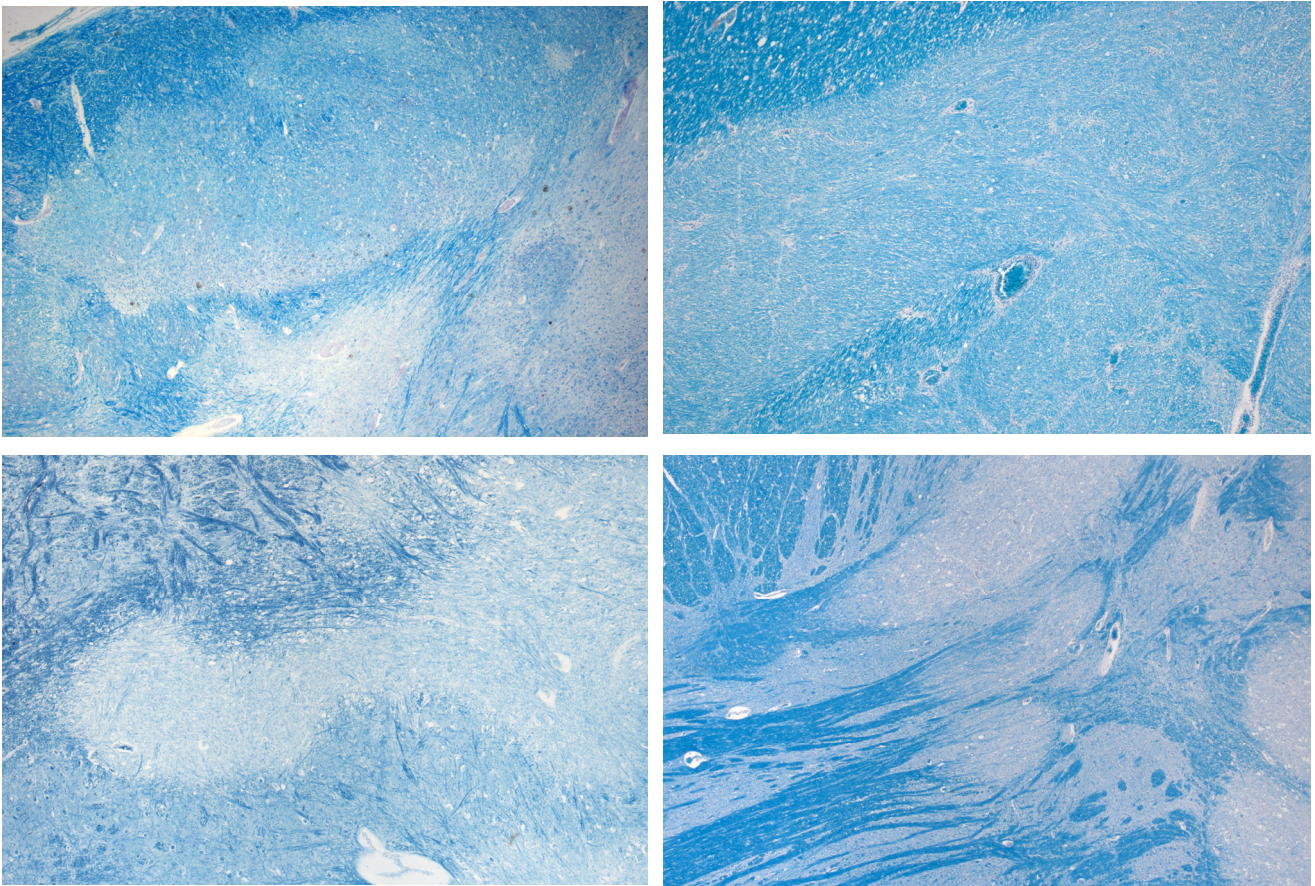

**Fig S18A** Four typical still-myelinated prephagocytic newly forming plaques. (Luxol Fast Blue).

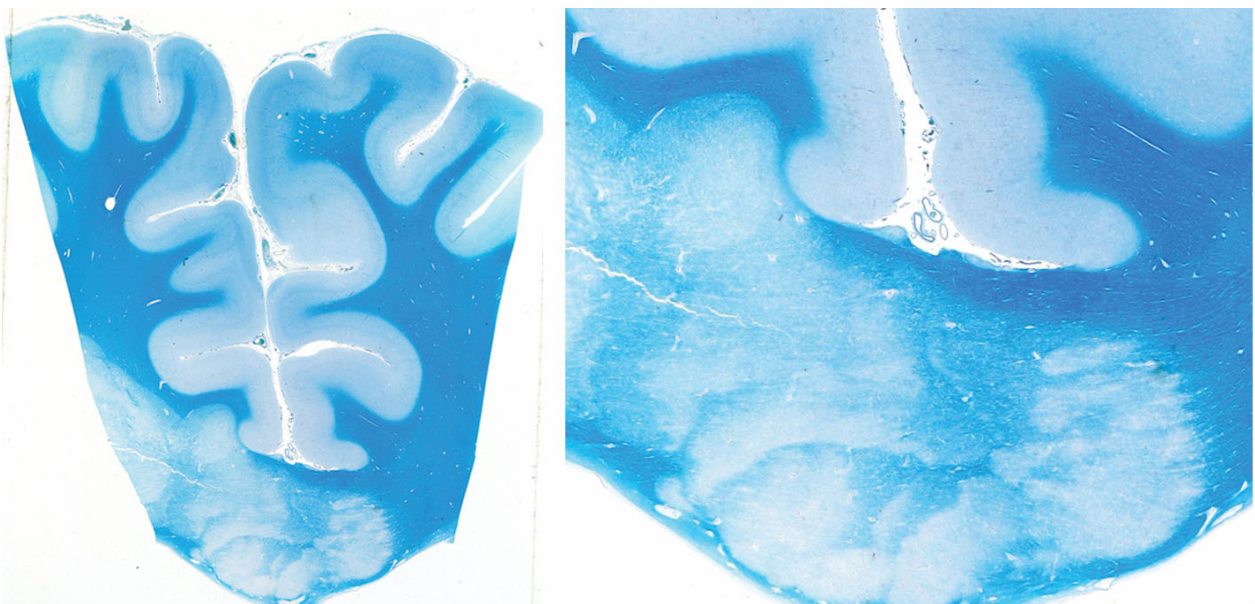

**Fig S18B** A still-myelinated prephagocytic plaque with very early commencing myelin breakdown. LFB+ macrophages were present but difficult to identify. The only phagocytes readily identifiable were intensely stained HAM56+ phagocytes present in small numbers scattered throughout the plaque. (Case 2, plaque 6, Luxol Fast Blue)
